# Supplementary figures and images for: Sustained miRNA-mediated Knockdown of Mutant AAT With Simultaneous Augmentation of Wild-type AAT Has Minimal Effect on Global Liver miRNA Profiles
Source: PubMed Central journal article supplement — Mol Ther. 2012 Jan 17;20(3):590–600. doi: 10.1038/mt.2011.292 (PMC3293602; doi:10.1038/mt.2011.292), 2012-01-17

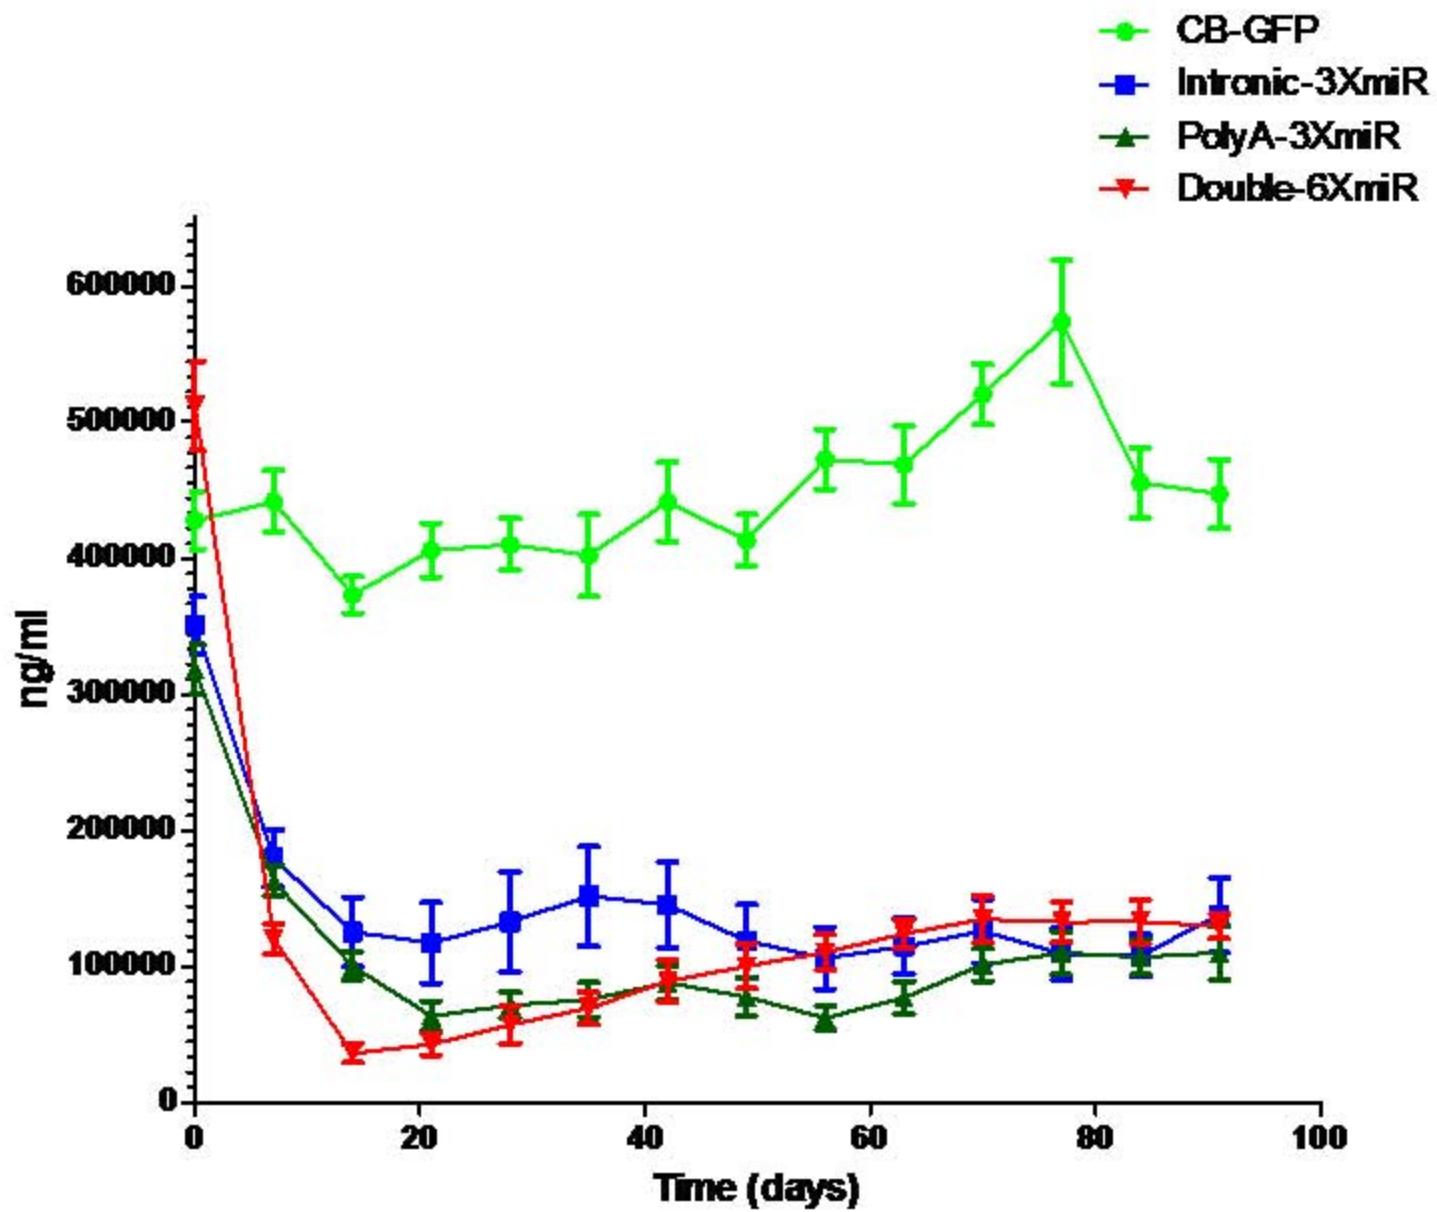

Supplement: mt2011292x1.pdf [file mt2011292x1.pdf]

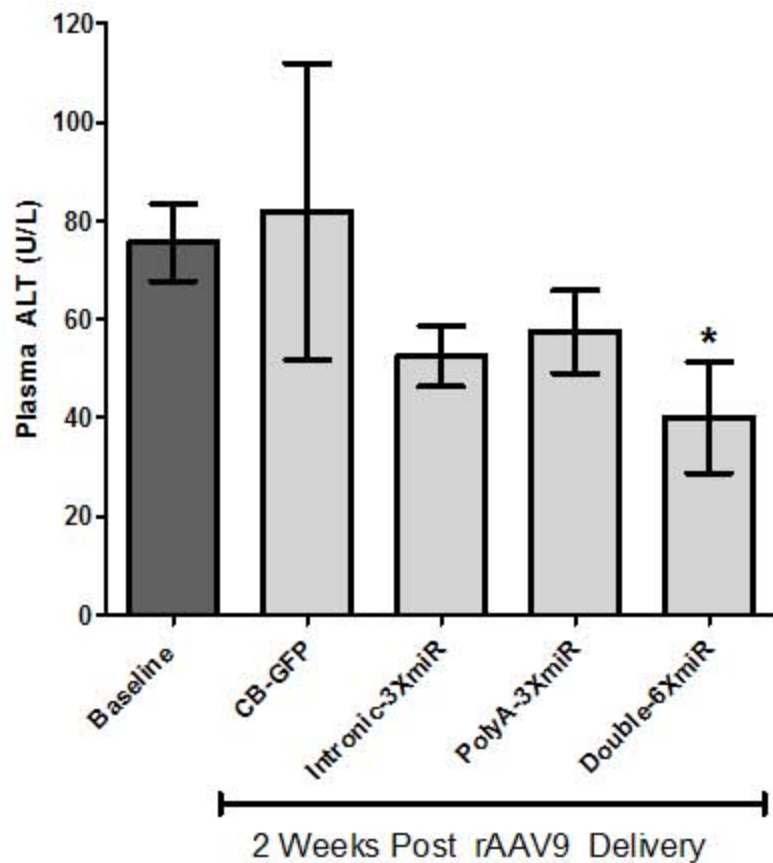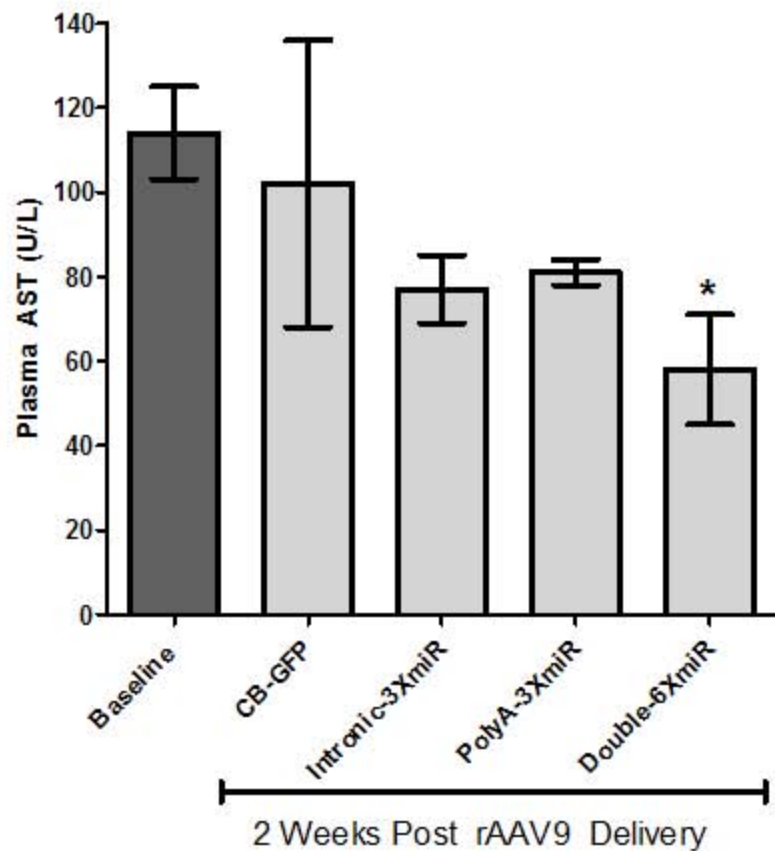

Supplement: mt2011292x2.pdf [file mt2011292x2.pdf]

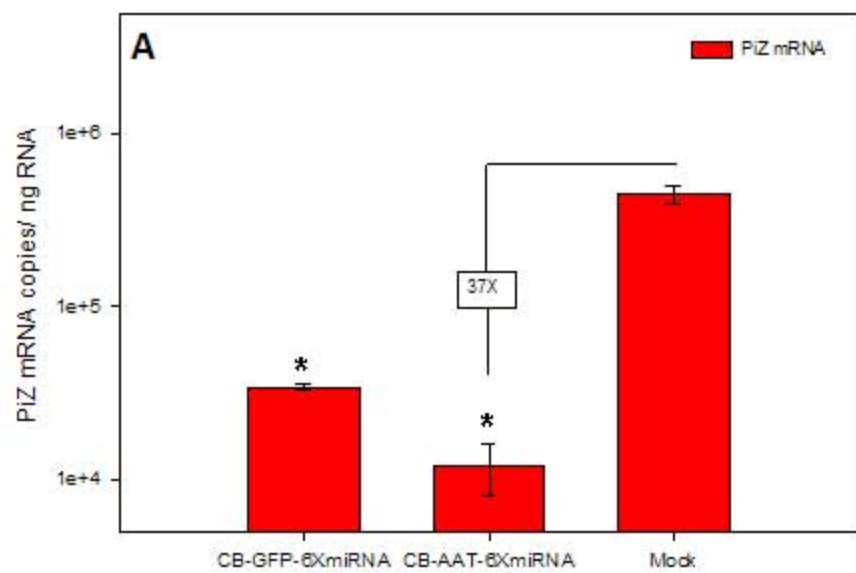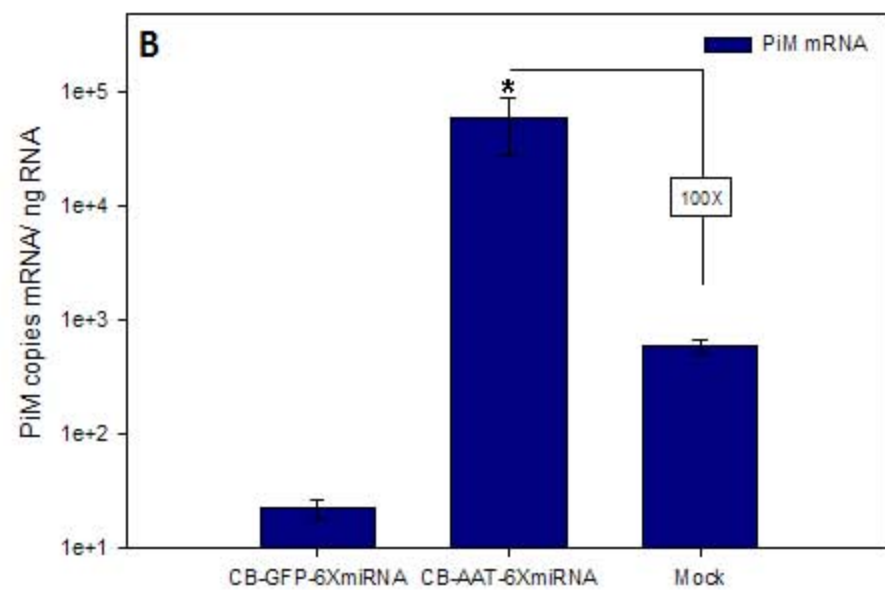

Supplement: mt2011292x3.pdf [file mt2011292x3.pdf]
